# Supplementary material for: In Vitro Anticancer Screening and Preliminary Mechanistic Study of A-Ring Substituted Anthraquinone Derivatives
Source: MDPI journal article supplement (doi:10.3390/cells11010168), 2022-01-05
Supplement: s1 [file s1]

# *In vitro* anticancer screening and preliminary mechanistic study of A-ring substituted anthraquinone derivatives

Ibrahim Morgan <sup>1</sup>, Ludger A. Wessjohann <sup>1,\*</sup> and Goran N. Kaluderović <sup>1,2,\*</sup>

<sup>1</sup> Department of Bioorganic Chemistry, Leibniz Institute of Plant Biochemistry, Weinberg 3, 06120, Halle (Saale), Germany; ibrahim.morgan@ipb-halle.de; wessjohann@ipb-halle.de; goran.kaluderovic@ipb-halle.de

<sup>2</sup> Department of Engineering and Natural Sciences, University of Applied Sciences Merseburg, Eberhard-Leibnitz-Straße 2, 06217 Merseburg, Germany; goran.kaluderovic@hs-merseburg.de

\* Correspondence: goran.kaluderovic@hs-merseburg.de (ORCID 0000-0001-5168-1000); wessjohann@ipb-halle.de (ORCID 0000-0003-2060-8235)

## Supporting Information

### 1. Structures and IC<sub>50</sub> values of anthraquinone derivatives

**Table S1:** Structures and IC<sub>50</sub> values (μM) of anthraquinones tested, determined by MTT and CV assay against HT-29, HeLa and HepG2 cell lines (48 h of treatment)

| Compound no. | Structure                                                                           | PC3                   |           | HT-29     |            | HeLa      |            | HepG2     |           |
|--------------|-------------------------------------------------------------------------------------|-----------------------|-----------|-----------|------------|-----------|------------|-----------|-----------|
|              |                                                                                     | IC <sub>50</sub> [μM] |           |           |            |           |            |           |           |
|              |                                                                                     | CV                    | MTT       | CV        | MTT        | CV        | MTT        | CV        | MTT       |
| 1            | 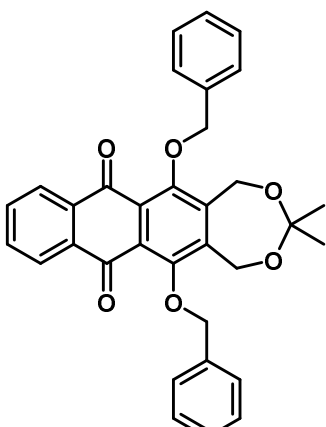 | 7.46±1.37             | 7.30±0.53 | 7.78±0.23 | 13.93±0.26 | 7.80±0.27 | 11.94±1.57 | 5.65±0.89 | 7.38±0.66 |



|    |                                                                                     |  |  |  |  |  |
|----|-------------------------------------------------------------------------------------|--|--|--|--|--|
|    |                                                                                     |  |  |  |  |  |
|    |                                                                                     |  |  |  |  |  |
|    |                                                                                     |  |  |  |  |  |
|    |                                                                                     |  |  |  |  |  |
|    |                                                                                     |  |  |  |  |  |
|    |                                                                                     |  |  |  |  |  |
|    |                                                                                     |  |  |  |  |  |
|    |                                                                                     |  |  |  |  |  |
|    |                                                                                     |  |  |  |  |  |
|    |                                                                                     |  |  |  |  |  |
| 8  | 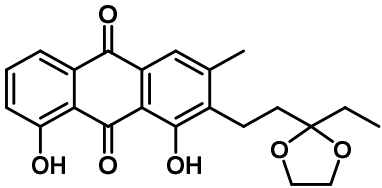   |  |  |  |  |  |
| 9  |    |  |  |  |  |  |
| 10 |   |  |  |  |  |  |
| 11 |  |  |  |  |  |  |
| 12 |  |  |  |  |  |  |
| 13 |  |  |  |  |  |  |

|                                                                                   |                                                                                   |                                                                                    |                                                                                     |                                                                                     |                                                                                     |                                                                                     |
|-----------------------------------------------------------------------------------|-----------------------------------------------------------------------------------|------------------------------------------------------------------------------------|-------------------------------------------------------------------------------------|-------------------------------------------------------------------------------------|-------------------------------------------------------------------------------------|-------------------------------------------------------------------------------------|
| 12.36±0.95                                                                        | 24.19±2.51                                                                        | 10.20±0.89                                                                         | 20.07±0.11                                                                          | 25.26±3.26                                                                          | 14.94±1.76                                                                          | 9.90±1.98                                                                           |
| 11.65±0.79                                                                        | 12.03±0.82                                                                        | 6.82±0.36                                                                          | 5.98±0.37                                                                           | 10.57±0.33                                                                          | 15.06±0.73                                                                          | 6.08±1.82                                                                           |
| 8.42±0.08                                                                         | 14.16±0.31                                                                        | 44.92±3.26                                                                         | 35.19±2.24                                                                          | 9.58±0.73                                                                           | 14.26±1.42                                                                          | 9.63±1.23                                                                           |
| 6.18±0.56                                                                         | 11.23±0.68                                                                        | 14.66±0.02                                                                         | 29.23±2.29                                                                          | 8.35±1.32                                                                           | 22.49±1.21                                                                          | 7.84±1.75                                                                           |
| 18.78±1.74                                                                        | 28.23±1.78                                                                        | >100                                                                               | 30.56±0.40                                                                          | 21.37±1.87                                                                          | 37.32±1.68                                                                          | 16.72±1.41                                                                          |
| 9.29±1.53                                                                         | 31.19±1.64                                                                        | >100                                                                               | 13.37±0.59                                                                          | 4.72±0.33                                                                           | 40.35±1.57                                                                          | 2.52±0.67                                                                           |
| 8.52±0.47                                                                         | 14.71±1.33                                                                        | 24.62±2.18                                                                         | 29.00±4.58                                                                          | 18.79±1.76                                                                          | 27.28±2.96                                                                          | 12.97±0.41                                                                          |
| 8.94±1.52                                                                         | 15.18±1.15                                                                        | 19.82±1.03                                                                         | 30.99±2.58                                                                          | 13.94±1.44                                                                          | 31.71±1.22                                                                          | 10.15±1.73                                                                          |
| 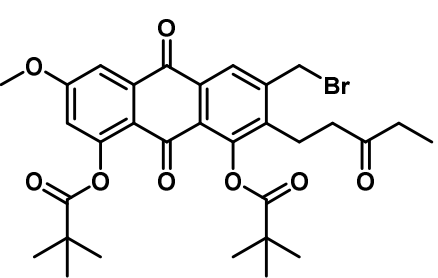 |  |  |  |  |  |  |

|    |                                                                                     |  |  |  |            |
|----|-------------------------------------------------------------------------------------|--|--|--|------------|
|    |                                                                                     |  |  |  | 17.79±0.35 |
|    |                                                                                     |  |  |  | 9.32±0.92  |
|    |                                                                                     |  |  |  | 95.23±5.37 |
|    |                                                                                     |  |  |  | 41.31±3.37 |
|    |                                                                                     |  |  |  | >100       |
|    |                                                                                     |  |  |  | >100       |
|    |                                                                                     |  |  |  | 30.00±2.28 |
|    |                                                                                     |  |  |  | 26.29±1.73 |
| 21 | 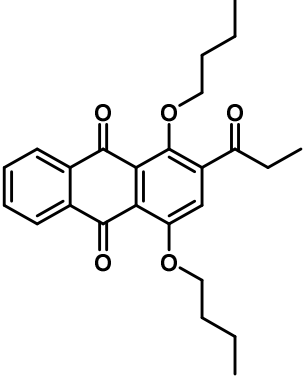   |  |  |  |            |
| 22 |   |  |  |  |            |
| 23 |  |  |  |  |            |
| 24 |  |  |  |  |            |
| 25 |  |  |  |  |            |

|    |                                                                                     |            |            |            |            |            |            |            |            |            |
|----|-------------------------------------------------------------------------------------|------------|------------|------------|------------|------------|------------|------------|------------|------------|
| 26 | 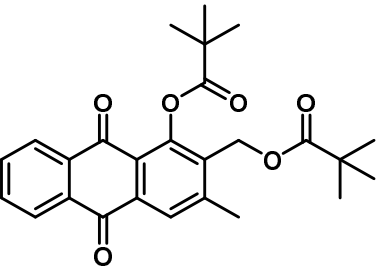   | 23.48±1.19 | 9.54±1.03  | >100       | 30.75±3.40 | 3.81±0.57  | 38.29±2.99 | 62.52±2.21 | >100       | 23.50±1.22 |
| 27 |    | 45.84±3.23 | 27.78±1.93 | 5.48±0.21  | 6.31±0.35  | *          | 13.34±0.22 | 53.32±4.10 | >100       | 20.63±2.92 |
| 28 |    | 16.50±1.86 | 22.51±1.78 | 60.34±1.72 | 12.12±1.45 | *          | 20.64±1.11 | 10.65±0.60 | 83.13±1.32 | 5.95±0.96  |
| 29 |   | *          | 24.09±2.16 | 94.11±1.59 | 27.49±1.79 | 32.22±1.69 | 41.45±3.82 | 54.86±4.74 | >100       | 41.70±1.62 |
| 30 |  | >100       | 15.64±1.39 | 80.71±4.19 | 10.50±1.86 | *          | 21.24±0.67 | 39.13±2.83 | >100       | 43.76±1.64 |
| 31 |  | >100       | 28.12±1.81 | 38.77±3.82 | 22.05±2.95 | 10.89±1.87 | >100       | >100       | >100       | 30.07±2.66 |
| 32 |  | >100       | 27.12±1.88 | 67.18±3.55 | 20.00±2.51 | 13.05±1.21 | 30.56±0.43 | 13.75±1.72 | 80.72±1.68 | 7.36±0.62  |
| 33 |  | 22.01±1.34 | 27.78±1.93 | 5.48±0.21  | 6.31±0.35  | *          | 13.34±0.22 | 53.32±4.10 | >100       | 20.63±2.92 |

\*Interfering with MTT assay

## 2. Fast screening results

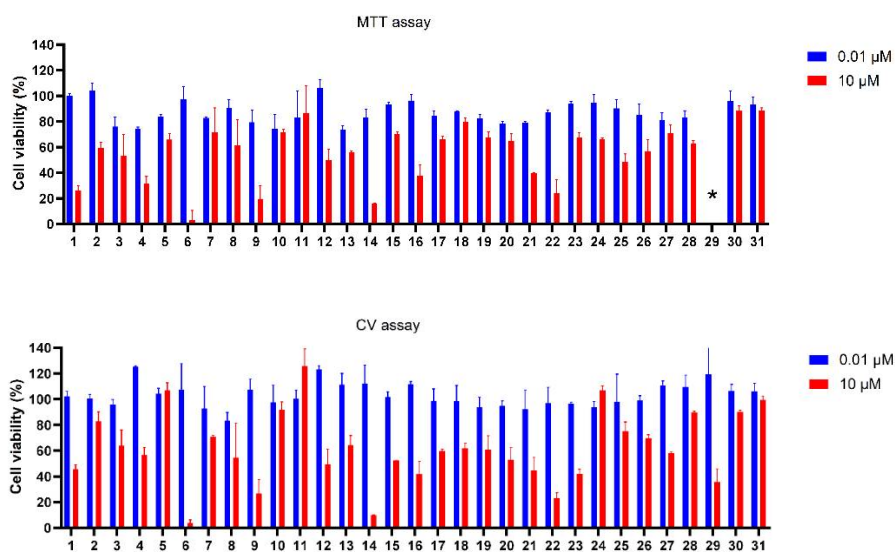

**Figure S1:** PC3 cell viability after 48 h treatment with anthraquinone derivatives  
(\*Interfering with MTT assay)

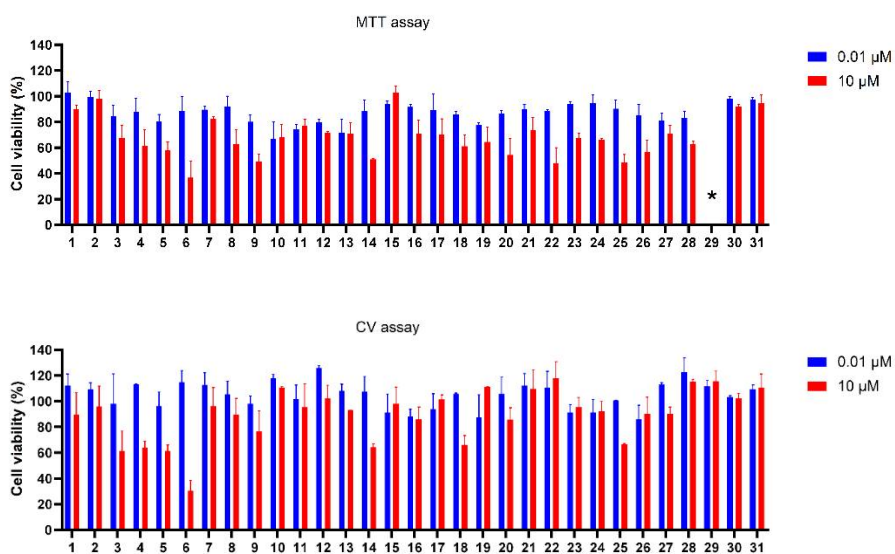

**Figure S2:** HT-29 cell viability after 48 h treatment with anthraquinone derivatives  
(\*Interfering with MTT assay)

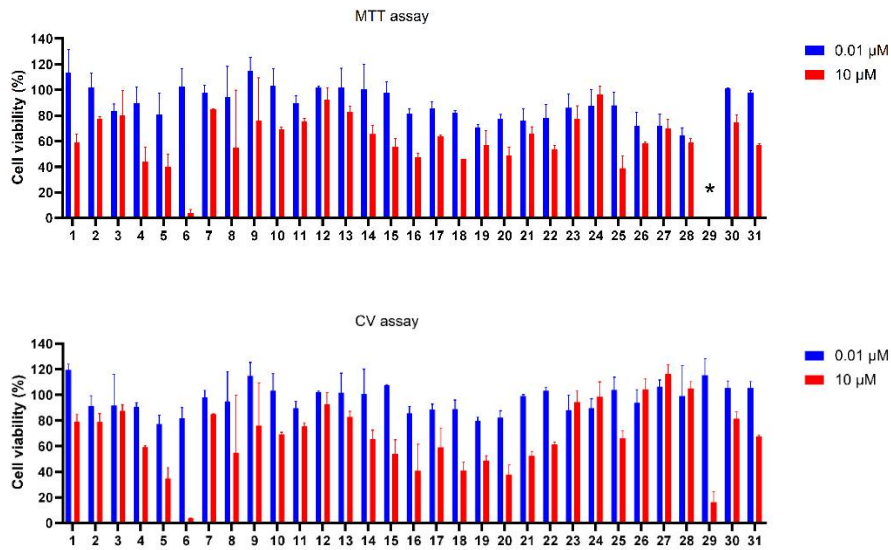

**Figure S3:** HeLa cell viability after 48 h treatment with anthraquinone derivatives  
(\*Interfering with MTT assay)

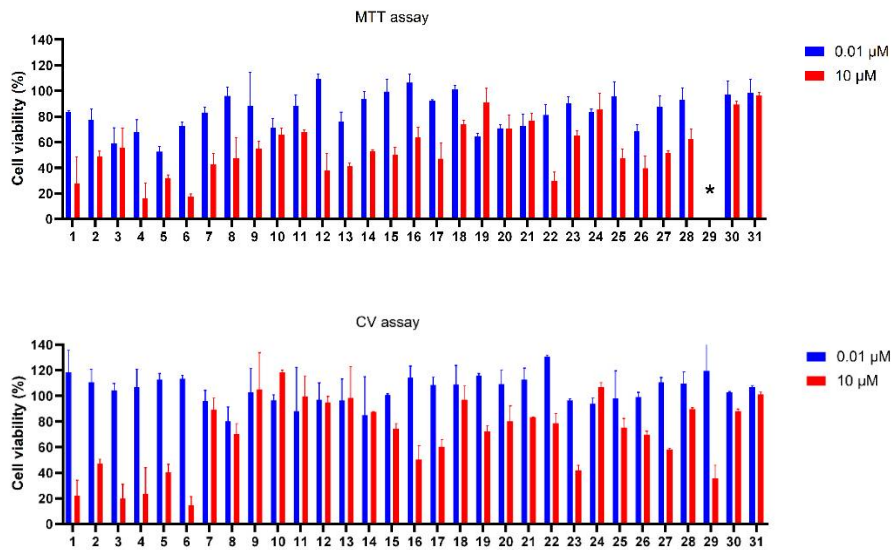

**Figure S4:** HepG2 cell viability after 48 h treatment with anthraquinone derivatives  
(\*Interfering with MTT assay)



### 3. IC<sub>50</sub> determination

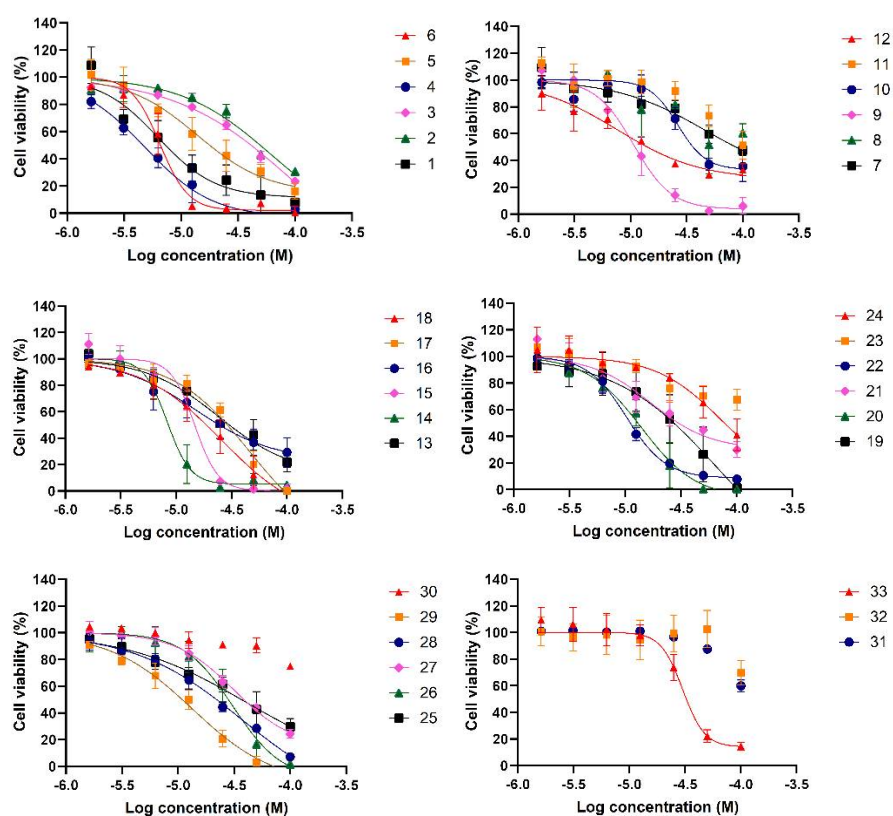

**Figure S5:** Dose-dependent response of PC3 cells treated with anthraquinone derivatives determined by MTT assay (48 h)

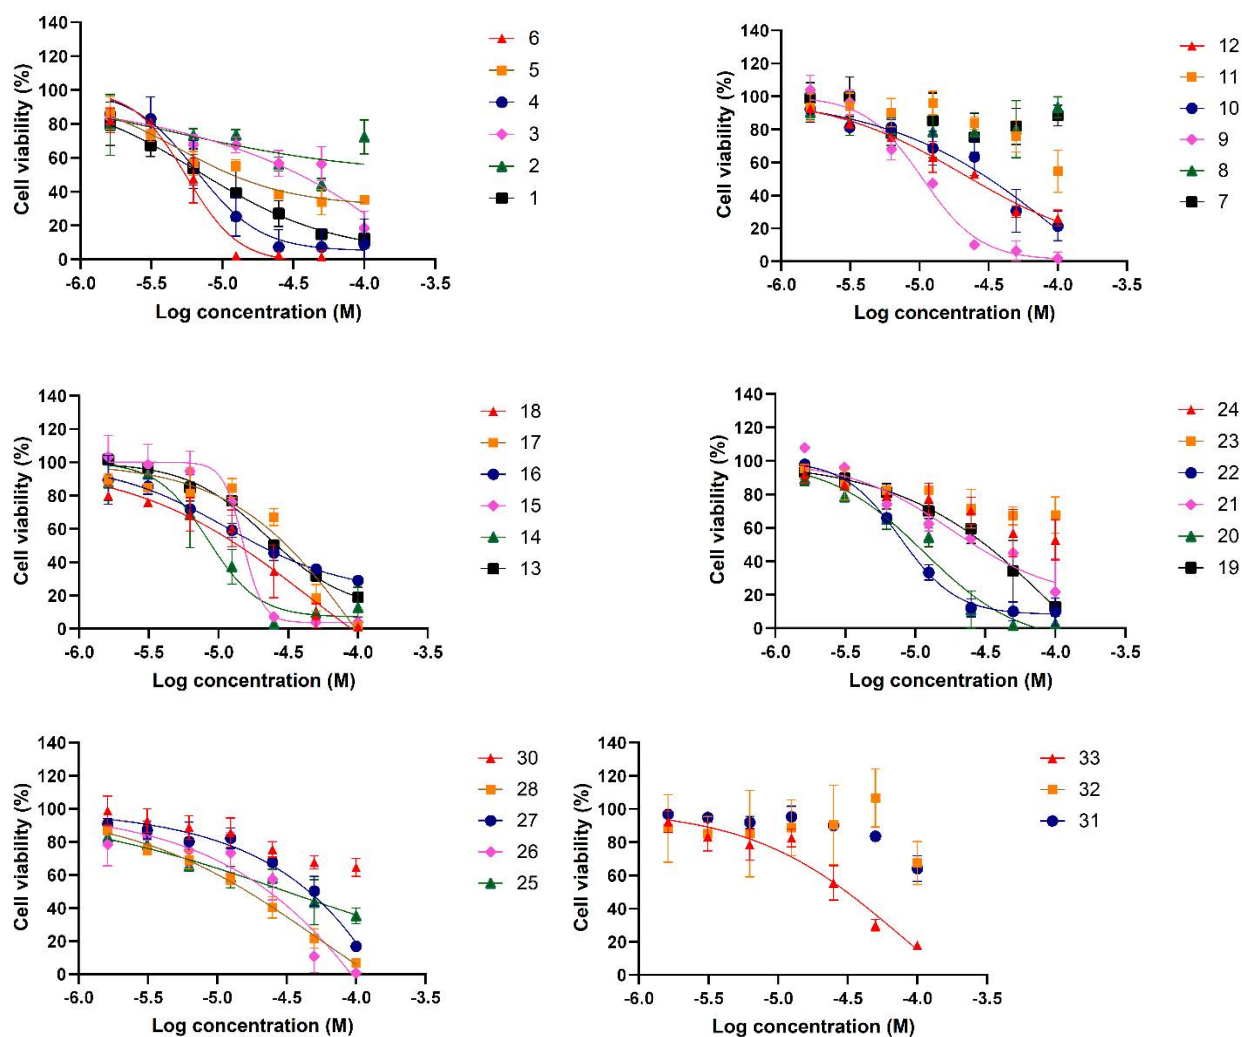

Figure S6: Dose-dependent response of PC3 cells treated with anthraquinone derivatives determined by CV assay (48 h)

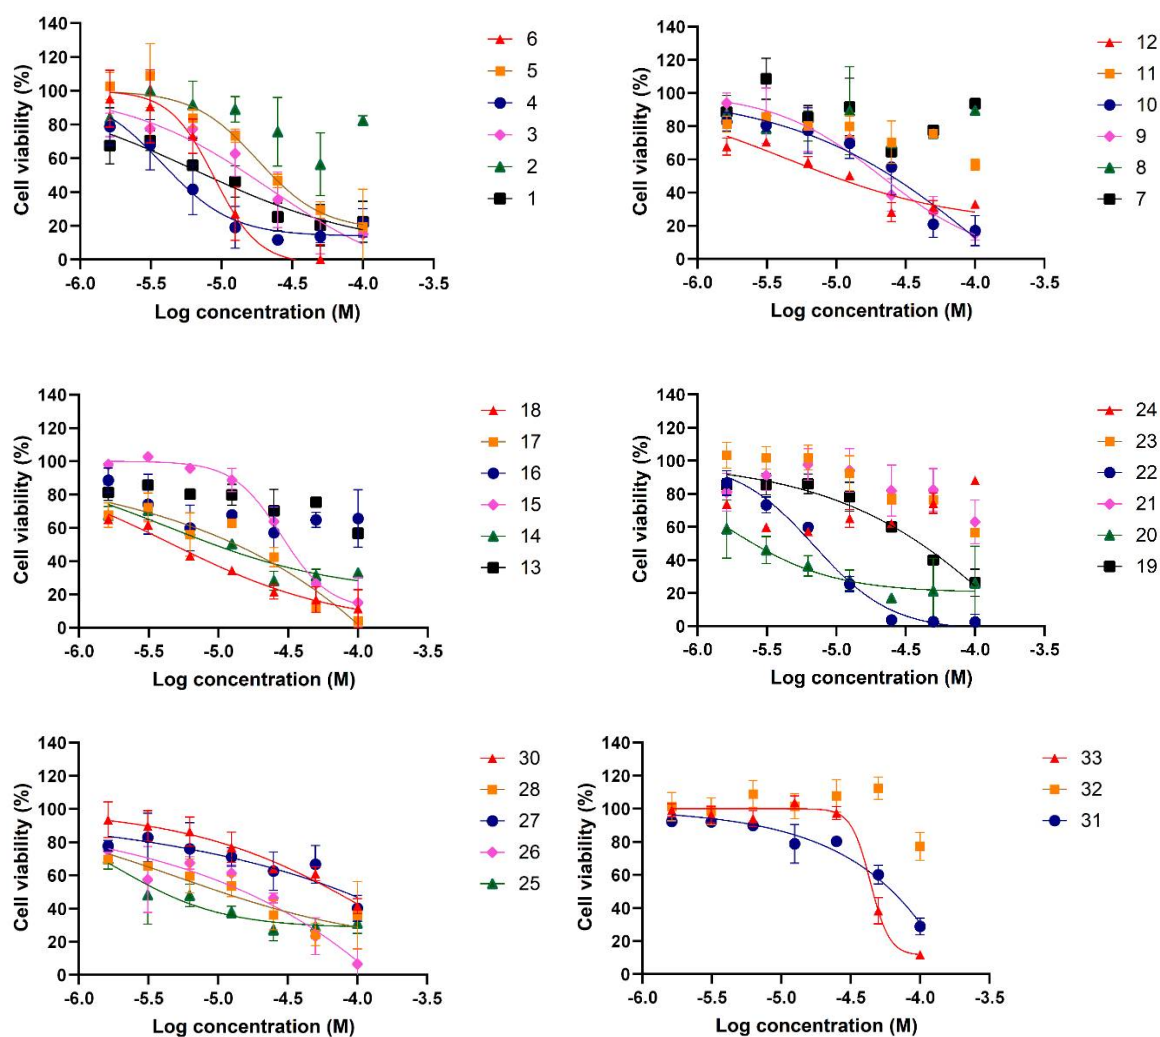

**Figure S7:** Dose-dependent response of HT-29 cells treated with anthraquinone derivatives determined by MTT assay (48 h)

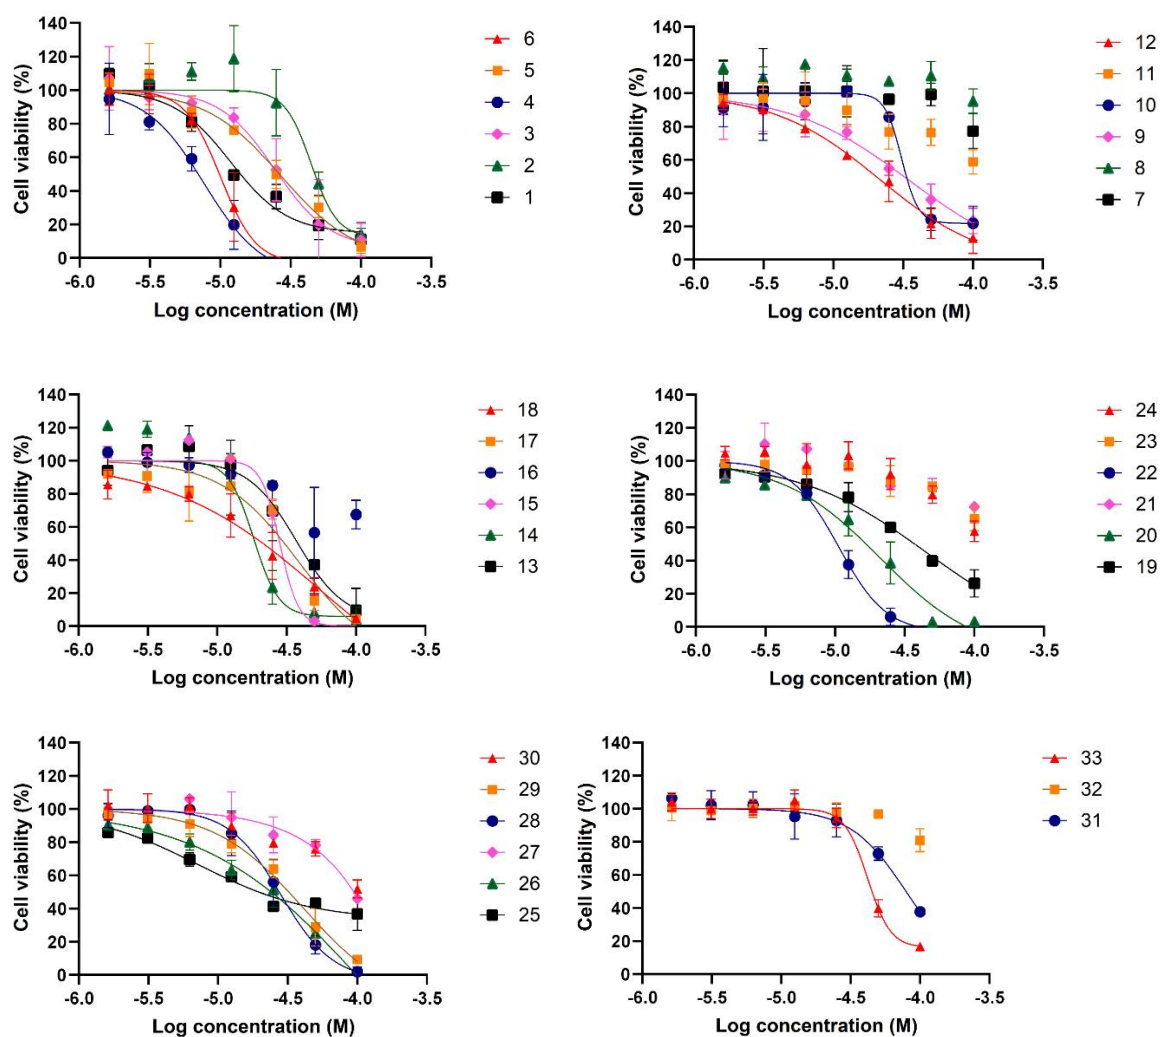

Figure S8: Dose-dependent response of HT-29 cells treated with anthraquinone derivatives determined by CV assay (48 h)

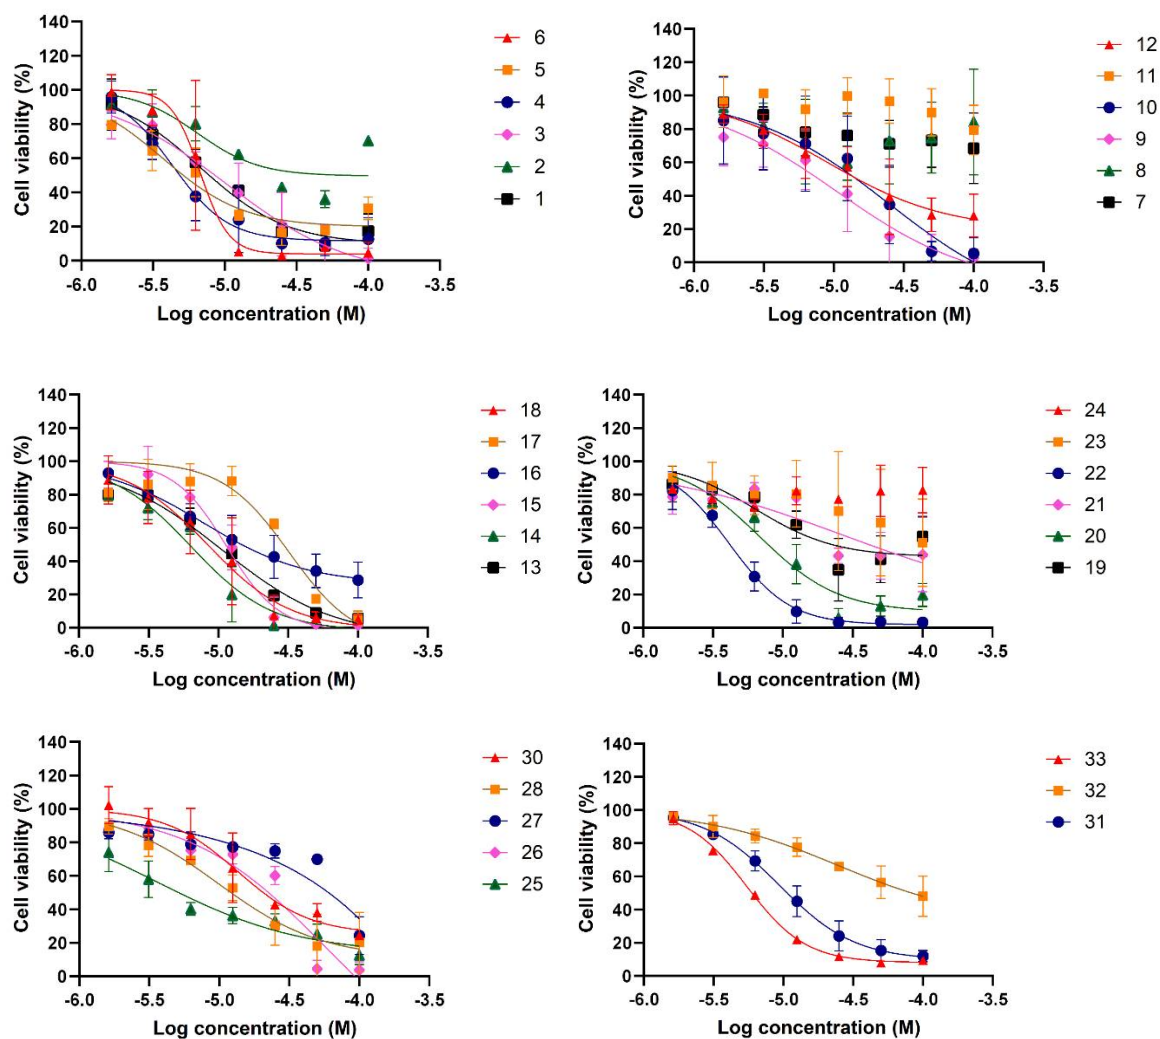

**Figure S9:** Dose-dependent response of HeLa cells treated with anthraquinone derivatives determined by MTT assay (48 h)

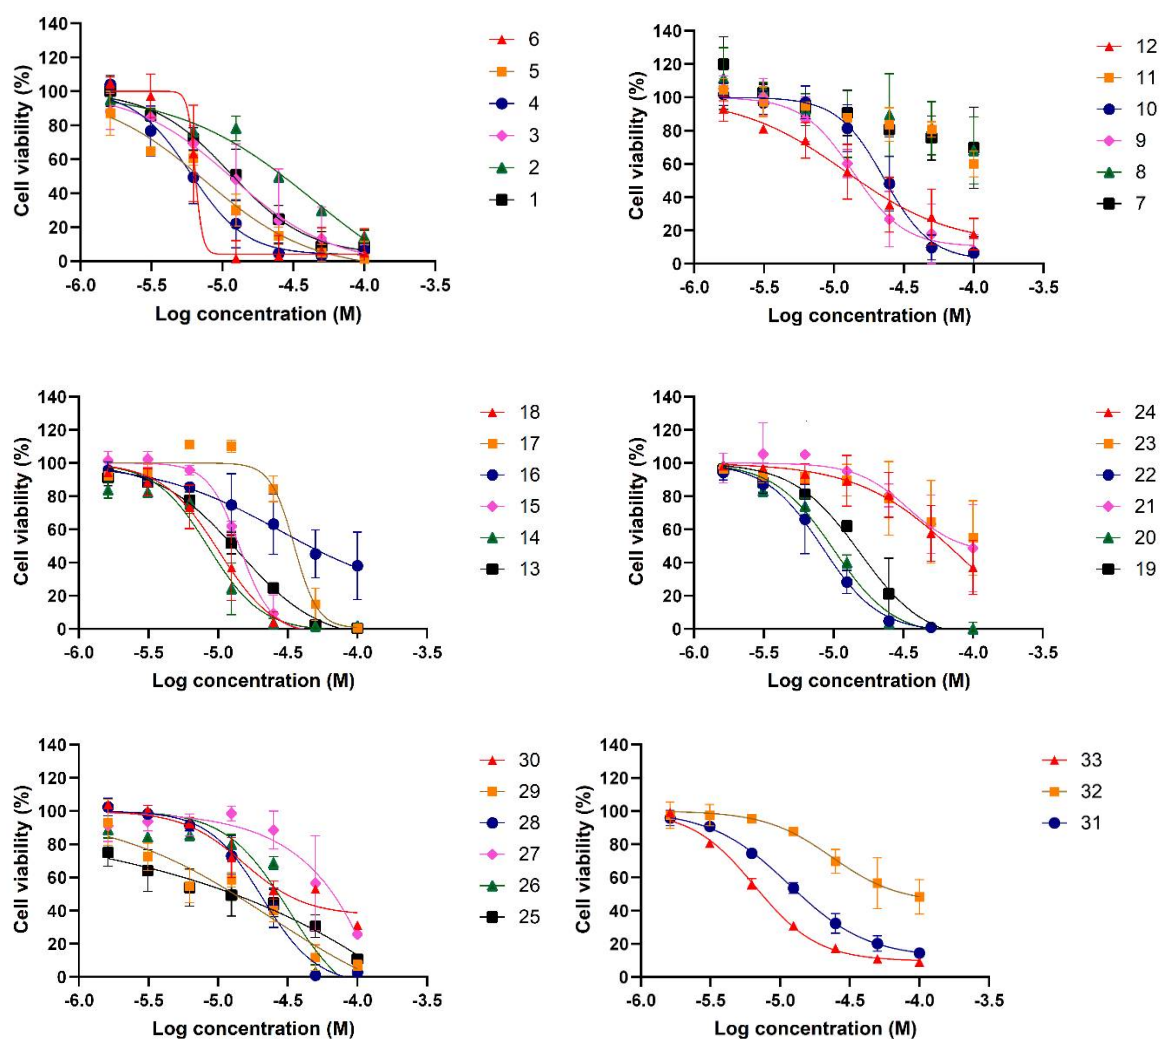

**Figure S10:** Dose-dependent response of HeLa cells treated with anthraquinone derivatives determined by CV assay (48 h)



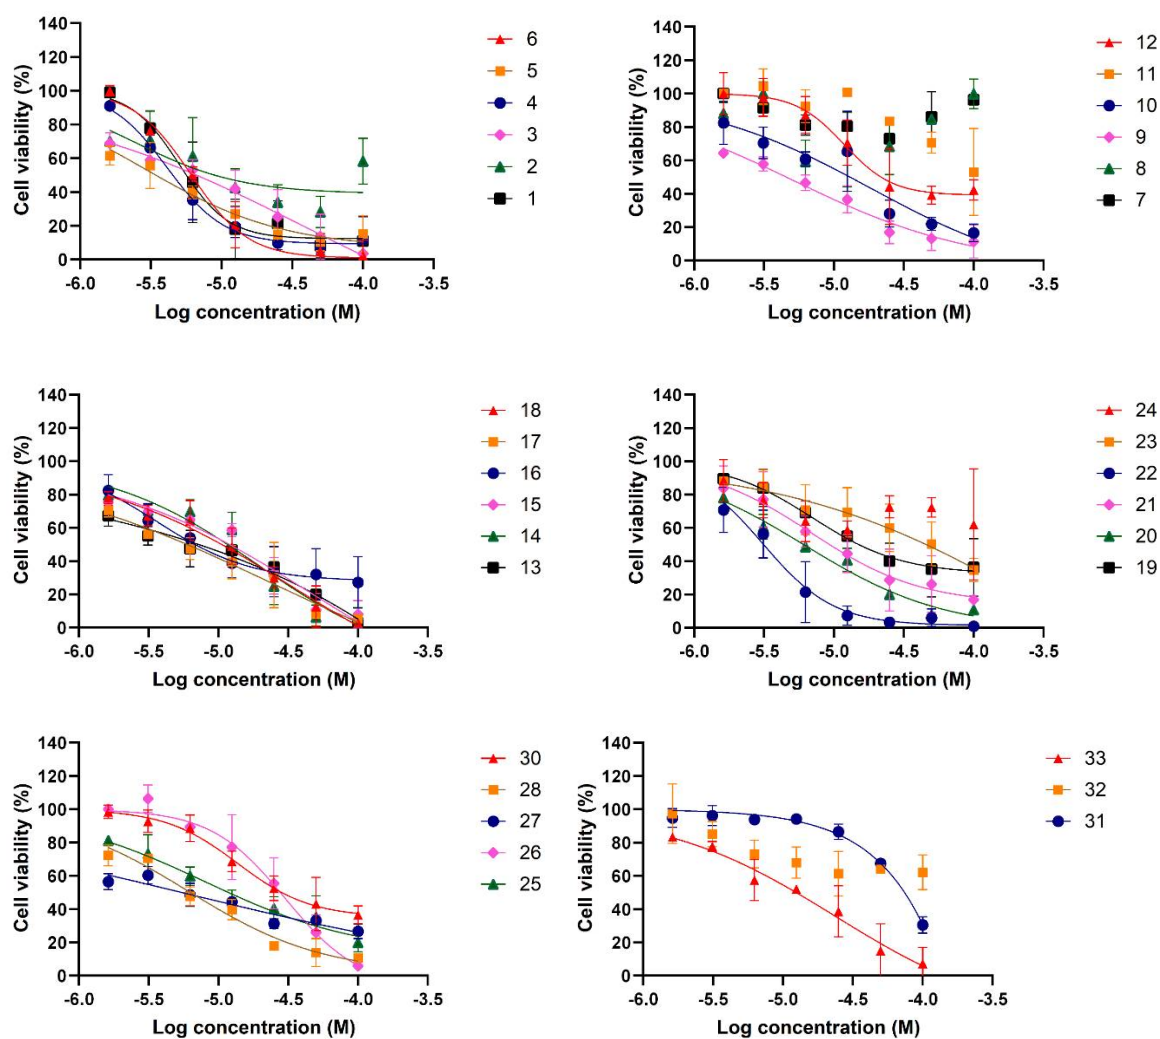

**Figure S11:** Dose-dependent response of HepG2 cells treated with anthraquinone derivatives determined by MTT assay (48 h)

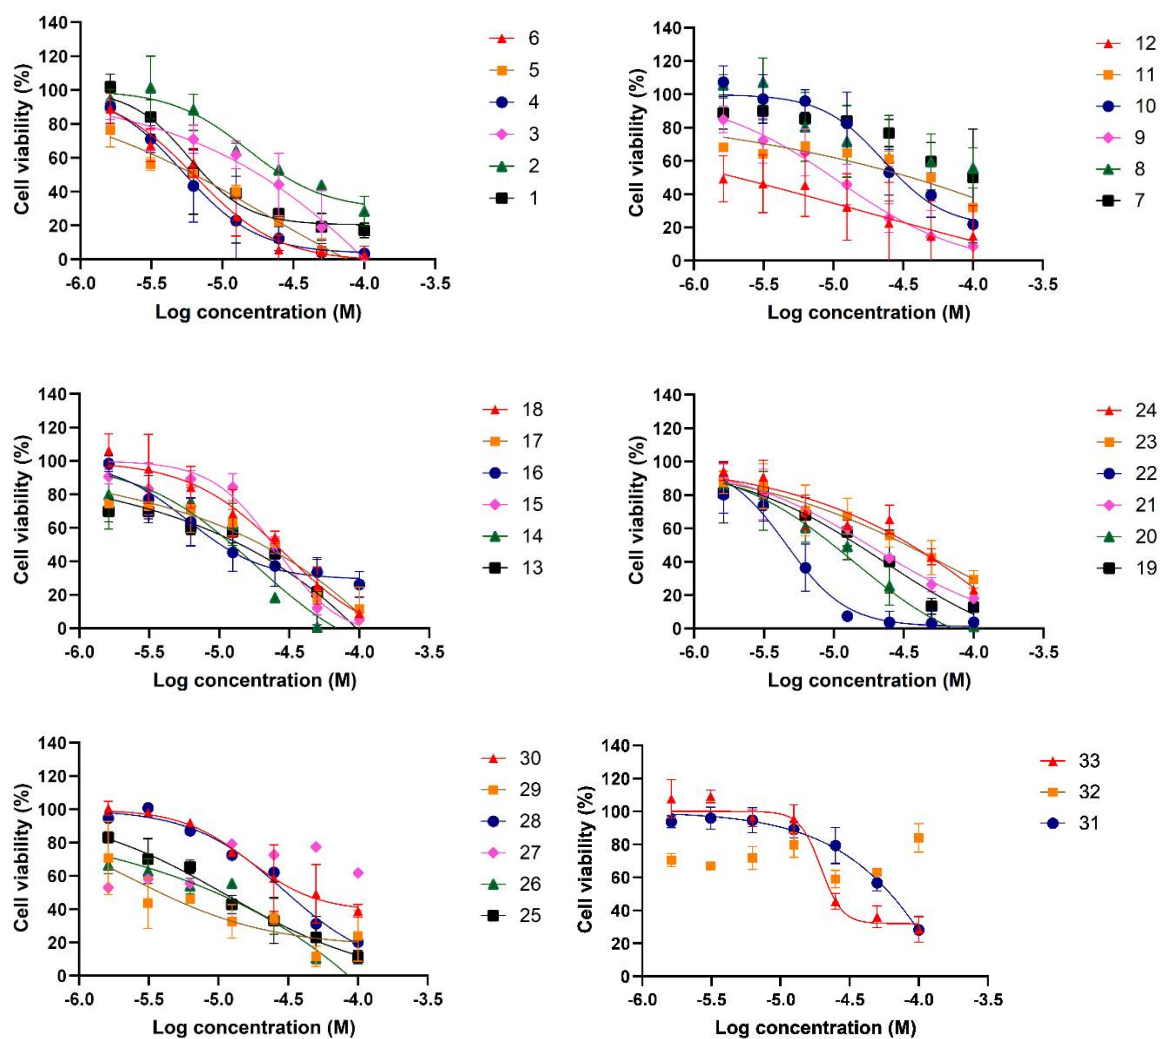

Figure S12: Dose-dependent response of HepG2 cells treated with anthraquinone derivatives determined by CV assay (48 h)
